# Supplementary material for: Knowledge, Attitude and Practice on Antibiotics and Its Resistance: Two Phases Mixed-Methods Online Study Among Pakistani Community Pharmacists to Promote Rational Antibiotics Use
Source: Preprints.org preprint supplement (doi:10.20944/preprints202101.0040.v1), 2021-01-04
Supplement: Supplementary file 1 [file supplementary]

**西安交通大学医学部生物医学伦理审查申请表**  
**Xi'an Jiaotong University Health Science Center**  
**Review Application Table for Ethical Review**

编号(N<sub>0</sub>): 2019-1236  
 申请日期 Application date:

|                                                                                                                                                                                                                                                                                                                                                                                                                                                           |                                       |                                              |
|-----------------------------------------------------------------------------------------------------------------------------------------------------------------------------------------------------------------------------------------------------------------------------------------------------------------------------------------------------------------------------------------------------------------------------------------------------------|---------------------------------------|----------------------------------------------|
| 项目名称:<br><b>Project Name:</b> What Pakistani Community Pharmacists think about the Antimicrobial Resistance: Mixed Methods Nationwide Survey from Pakistan.                                                                                                                                                                                                                                                                                               |                                       |                                              |
| 项目负责人:<br><b>Principal investigators name:</b> Yu Fang                                                                                                                                                                                                                                                                                                                                                                                                    |                                       | 职称 <b>Title:</b> Professor                   |
| 电话 <b>Tel:</b> 18591970591                                                                                                                                                                                                                                                                                                                                                                                                                                | 电子信箱 <b>Email:</b> yufang@xjtu.edu.cn |                                              |
| 研究单位:<br><b>Research Units:</b> Center for Drug Safety and Policy Research (CDSP)                                                                                                                                                                                                                                                                                                                                                                         |                                       |                                              |
| 合作研究单位:<br><b>Cooperative Research Unit:</b>                                                                                                                                                                                                                                                                                                                                                                                                              |                                       | 负责人:<br><b>Principal investigators name:</b> |
| 联系电话 <b>Tel:</b> 18591970591                                                                                                                                                                                                                                                                                                                                                                                                                              | 传真 <b>Fax:</b>                        | 邮编 <b>Postcode:</b> 710000                   |
| 研究者:<br><b>Investigators:</b> Faiz Ullah Khan                                                                                                                                                                                                                                                                                                                                                                                                             |                                       | 职称:<br><b>Title:</b> Ph.D (Scholar)          |
| 拟研究时间:<br><b>Research period:</b> January 2019 to September, 2019                                                                                                                                                                                                                                                                                                                                                                                         |                                       |                                              |
| 研究课题来源: <input type="checkbox"/> 政府 <input type="checkbox"/> 基金会 <input type="checkbox"/> 公司 <input type="checkbox"/> 国际组织 <input type="checkbox"/> 其他:<br><hr/> <b>Research source:</b> <input type="checkbox"/> Government <input type="checkbox"/> Foundation <input type="checkbox"/> Company <input type="checkbox"/> International organization <input type="checkbox"/> <b>Others:</b> <u>Xian Jiatong University</u>                              |                                       |                                              |
| 递交审查资料:<br><b>Submit review data:</b> There is a need to get ethical approval for this study as we need to conduct interviews from community Pharmacists in Pakistan. There is no experimental trial on antibiotics consumers, but their interview will be taken with their written consent. Since, it is the requirement of many journals that whenever you conduct such type of study it should be approved by the ethical committee of the university. |                                       |                                              |

研究内容  
摘要  
**Research  
Abstract**

Nowadays, the emergence and spread of resistance to antibiotics is a growing problem worldwide, which presents a significant danger to public health globally in the 21st century. The increase of antibiotics resistance will endanger their therapeutic effectiveness, increase treatment failures and, as a result, lead to longer and more severe illness episodes with higher costs and mortality rates. The irrational and overuse of antibiotics are among the key factors for the increase and spread of resistance.

The World Health Organization (WHO) has declared Antimicrobial Resistance (AMR) as a major global threat. One of the strategies to reduce AMR is to control inappropriate use of antimicrobials.

The objective of the current study is to evaluate the knowledge, attitude and practices of the community pharmacists towards the antimicrobial resistance through a mixed methodology approach from Pakistan.

A mixed methods design will be applied with a semi-structured interview will be chosen to understand the perception, attitude and knowledge of Pharmacists about AMR in Pakistan.

Different statistical tools will be used for the collected data (quantitative) and probing questions will be asked in order to get knowledge in depth (qualitative). Interviews will be transcribed verbatim and thematic analysis

A positive approach towards the AMR in Pakistan is expected.

|                                                                                                                                                                                      |                                               |                                |                                   |                                 |
|--------------------------------------------------------------------------------------------------------------------------------------------------------------------------------------|-----------------------------------------------|--------------------------------|-----------------------------------|---------------------------------|
| 审查结果<br>Review Result                                                                                                                                                                | 医学生物科研伦理委员会意见<br>Opinions of Ethics Committee | <input type="checkbox"/> 同意    | <input type="checkbox"/> 不同意      | <input type="checkbox"/> 修改     |
|                                                                                                                                                                                      |                                               | <input type="checkbox"/> Agree | <input type="checkbox"/> Disagree | <input type="checkbox"/> Revise |
| 伦理委员会主任委员签章 (Signature of Ethics Committee Director):<br>伦理委员会签章 (Signature of Ethics Committee):  |                                               |                                |                                   |                                 |
| <div style="text-align: right;">             年 月 日           </div>                                                                                                                  |                                               |                                |                                   |                                 |

## 西安交通大学医学部医学生物科研伦理审批件

编号(Nº): 201 -

我部 申请的

经过医学伦理委员会的审核，

符合伦理原则，同意开展。

西安交通大学医学部生物医学伦理委员会

伦理委员会主任委员签章

201 年 月 日



**Xi'an Jiaotong University Health Science Center**  
**Biology scientific research ethics approval**

No: 201-19-1256

Professor Yu Fang's application entitled "What Pakistani Community Pharmacists think about the Antimicrobial Resistance: Mixed Methods Nationwide Survey from Pakistan." was approved by the Medical Ethics Committee and complied with ethical principles.

---

**Biomedical Ethics Committee of Xi'an Jiaotong University**

Signature of Ethics Committee Director

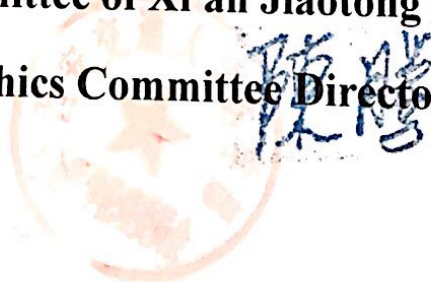

# Participant Information Pack

**Content:**

Participant Information Sheet

Informed Consent

Informed Consent declaration

Questionnaire (Quantitative)

Questionnaire (Interview Guide)

## A. PARTICIPANT INFORMATION SHEET

You are being invited to participate in a research study titled “**What Pakistani Community Pharmacists think About the nonprescription of Antibiotics and Antibiotic resistance and the way to the rational use of antibiotics: A Nationwide Mixed Methodology approach**”.

### **Purpose of study:**

This study aims to assess pharmacists' knowledge, attitude, and practice regarding antimicrobial use over the counter and antibiotic resistance in Pakistan and will take you approximately 10-15 minutes to complete. After completion of the first part upon your willingness, you can participate in the second part of the study for which we will call you through WhatsApp or other applications feasible to you.

### **Your Participation:**

Your participation in this study is entirely voluntary and you can withdraw at any time. We believe there are no known risks associated with this research study; however, as with any online related activity, the risk of a breach is always possible. To the best of our ability, your answers in this study will remain confidential. We assure you that all data collected will be anonymous. All data will be stored electronically on password-protected media for a maximum of three years. All data collection, storage, and processing will comply with the principles of the Data Protection.

## B. INFORMED CONSENT

You will be asked to sign an informed consent stating that you understand the nature of the study and what is required from you in the study. Participation in this study is voluntary and will not affect your privacy. You are free at any time to change your mind and withdraw from the study without needing to justify your decision.

\* By completing this survey please click AGREE to indicate that:

- You are a pharmacist aged 18 years or older
- You practice as full-time or part-time in a community pharmacy in Pakistan
- You have read the participant information sheet associated with this study

Sign (optional) \_\_\_\_\_

# PART-I

## Questionnaire

### Section 1: Demographics

**Please tick the relevant box or write your answer when appropriate**

|                     |  |  |
|---------------------|--|--|
| Gender              |  |  |
| Male                |  |  |
| Female              |  |  |
| Age (years)         |  |  |
| 19 to 26            |  |  |
| 27 to 34            |  |  |
| >35                 |  |  |
| Education*          |  |  |
| B Pharmacy/Pharm D  |  |  |
| M.Phil.             |  |  |
| Region              |  |  |
| KPK                 |  |  |
| Sindh               |  |  |
| Punjab              |  |  |
| Balochistan         |  |  |
| Islamabad           |  |  |
| AJK                 |  |  |
| GB                  |  |  |
| Experience (years)  |  |  |
| < 1                 |  |  |
| 1 to 2              |  |  |
| >2                  |  |  |
| Type of drug outlet |  |  |
| Pharmacy            |  |  |
| Other Drug outlets  |  |  |

---

## Section 2: Knowledge

| Questions                                                                                                                                                                                                                                                               | Yes (%) | No (%) | Unsure (%) |
|-------------------------------------------------------------------------------------------------------------------------------------------------------------------------------------------------------------------------------------------------------------------------|---------|--------|------------|
| The 'Superbugs' are responsible for antibiotic resistance, including (bacteria, fungal, parasites, and viruses).                                                                                                                                                        |         |        |            |
| Resistance (DNA) in bacteria can transfer to other bacteria through a virus carrier.                                                                                                                                                                                    |         |        |            |
| is it true that AMR in a hospital setting is higher than community setting?                                                                                                                                                                                             |         |        |            |
| AMS aims to achieve an effective clinical outcome with less toxicity and ADRs                                                                                                                                                                                           |         |        |            |
| Penicillin, cephalosporin, and fluoroquinolone are $\beta$ -lactam antibiotics, It needs to consider Beta-lactamase producing bacterial.                                                                                                                                |         |        |            |
| Amoxicillin allergic patients (Anaphylaxis type) should not use Cephalexin.                                                                                                                                                                                             |         |        |            |
| is it appropriate? When a pharmacist dispenses amoxicillin 1,500 mg a day, 7 days for a 26-year-old male with allergic rhinitis, has high-grade fever rhinorrhea, and sore throat, and no known drug allergies.                                                         |         |        |            |
| Is it appropriate? When a pharmacist dispenses only mineral powder in case of a 2-year-old boy with watery diarrhea, no mucous/bloody stool, no fever, no vomiting, no known drug allergies.                                                                            |         |        |            |
| Is it appropriate? When a pharmacist dispenses dicloxacillin 250 mg four times a day for 5 days to prevent infection in case of a 24-year old male who has had a skin abrasion wound on his right arm without exudates for 2 days, limited to the subcutaneous layer, m |         |        |            |



## Section 2: Attitude

| Questions                                                                                                                                                   | SA (%) | A (%) | N (%) | DA (%) | SD (%) |
|-------------------------------------------------------------------------------------------------------------------------------------------------------------|--------|-------|-------|--------|--------|
| AMR is an important public health issue?                                                                                                                    |        |       |       |        |        |
| The fact that a patient is taking antibiotic increases the risk of developing resistance.                                                                   |        |       |       |        |        |
| New antimicrobials discoveries and development can solve the AMR problem.                                                                                   |        |       |       |        |        |
| The use of antimicrobials in livestock animals is an important cause of the appearance of new resistance to pathogenic agents in humans.                    |        |       |       |        |        |
| In all cases where antibiotics are dispensed, patients must be advised about complying with the treatment.                                                  |        |       |       |        |        |
| Antibiotics are sometimes dispensed without medical prescription because the patient is known to have difficulty in obtaining a medical consultation.       |        |       |       |        |        |
| Antimicrobials are sometimes prescribed without medical prescription because the patient is known to have neither the time nor the money to see a physician |        |       |       |        |        |
| Dispensing antibiotics without prescription is a serious issue.                                                                                             |        |       |       |        |        |

### Section 3: Practices

| Questions                                                                                                                          | SA (%) | A (%) | N (%) | DA (%) | SD (%) |
|------------------------------------------------------------------------------------------------------------------------------------|--------|-------|-------|--------|--------|
| I educate patients on the use of antimicrobials and resistance-related issues.                                                     |        |       |       |        |        |
| I take part in antibiotics awareness campaigns to promote the optimal use of antimicrobials.                                       |        |       |       |        |        |
| I have lack to continuing education in antibiotics use and resistance topics.                                                      |        |       |       |        |        |
| I make efforts to prevent or reduce the transmission of infections with in the community                                           |        |       |       |        |        |
| I collaborate with other health professionals for infection control and antimicrobial stewardship.                                 |        |       |       |        |        |
| I ask patient's history and symptom of their infections before deciding to dispense antibiotics.                                   |        |       |       |        |        |
| I sought additional clinical information (e.g. drug interaction, ADRs, allergy, etc.) before deciding to dispense the antibiotics. |        |       |       |        |        |
| I screen the antibiotics in accordance with local guidelines before dispensing.                                                    |        |       |       |        |        |
| I dispense antibiotics with complete clinical information (e.g. drug interaction, ADRs, allergy, etc.)                             |        |       |       |        |        |
| I dispense antibiotics without a prescription.                                                                                     |        |       |       |        |        |

# PART-II

## Interview Guide

### COMMUNITY PHARMACIST INTERVIEW GUIDE

#### **II. How to improve the rational use of antibiotics**

##### **1.Demogrsaphics:**

Name: \_\_\_\_\_

Age: \_\_\_\_\_

Gender: \_\_\_\_\_

Place: \_\_\_\_\_

Degree: \_\_\_\_\_

Current Job: \_\_\_\_\_

Name of Pharmacy: \_\_\_\_\_

Total Years of Experience: \_\_\_\_\_

##### **Community pharmacist interview Guide**

1. In your practice, what are the most common types of infectious diseases you encounter?

**Prob: what are the most common infections common in your community?**

2. in your opinion, what are some common misconceptions of patients about antibiotic use?

**Probe: self-medication, use of antibiotics in viral diseases such as flu, stoppage of antibiotics without consultation with a doctor, side effects of antibiotics.**

3. Which strategies should be considered the highest priority to resolve from the perspective of healthcare providers (Physician-Pharmacist linkage)?

4. What are some actions you currently use to improve antibiotic use in your area of practice?

**Probe: education and counseling**

5. In your opinion, what are some services that community pharmacists could offer to enhance the appropriate use of antibiotics by the general population in the community?

**Probe: awareness campaigns, public education**

6. Do you feel community pharmacists need additional training to implement suggested strategies?

**Probe: short-term training or long-term training**

7. What are some barriers to implementing interventions you have indicated to improve antibiotic use at your practice site?

**Probe: budget constraints, time constraints, incompetent staff, absence of community pharmacists, lack of enforcement of laws to restrict antibiotic prescribing without a prescription.**

8. What are some strategies to overcome barriers which would allow community pharmacists to provide services relating to improving antibiotic use at your practice site?

9. Is there anything else you would like to say about improving antibiotic use in the community through pharmacist lead interventions?

---

## **COMMUNITY PHARMACIST INTERVIEW GUIDE**

### **II. How to improve the rational use of antibiotics**

#### **1. Demographics:**

**S.No**\_\_\_\_\_

1. Gender: \_\_\_\_\_
2. Age: \_\_\_\_\_
3. Place: \_\_\_\_\_
4. Degree: \_\_\_\_\_
5. Current Job: \_\_\_\_\_
6. Name of Pharmacy: \_\_\_\_\_
7. Total Years of Experience: \_\_\_\_\_

#### **Community pharmacist interview Guide**

##### **Probe: infections**

1. In your practice, what are the most common types of infectious diseases you encounter?

##### **Probe: what are the most common infections common in your community?**

2. In your opinion, what are some common misconceptions of patients about antibiotic use?

##### **Probe: Self-medication with antibiotics (use in viral diseases such as flu), stoppage of antibiotics without consultation with a doctor.**

3. Which strategies should be considered the highest priority to resolve from the perspective of healthcare providers (Physician-Pharmacist linkage)?
4. What are some actions you currently use to improve antibiotic use in your area of practice?

**Probe: Education and counseling**

5. In your opinion, what are some services that community pharmacists could offer to enhance the appropriate use of antibiotics by the general population in the community?

**Probe: awareness campaigns, public education**

6. Do you feel community pharmacists need additional training to implement suggested strategies?

**Probe: short-term training or long-term training**

7. What are some barriers to implementing interventions you have indicated to improve antibiotic use at your practice site?

**Probe: budget constraints, time constraints, incompetent staff, absence of community pharmacists, lack of enforcement of laws to restrict antibiotic prescribing without a prescription.**

8. What are some strategies to overcome barriers which would allow community pharmacists to provide services relating to improving antibiotic use at your practice site?

9. Suggestions for the prescription only antibiotics

Is there anything else you would like to say about improving antibiotic use in the community through pharmacist lead interventions?

Others \_\_\_\_\_



| Summary of the Interview Guide                    |                                                 |
|---------------------------------------------------|-------------------------------------------------|
| Infections                                        | Most common type of infections in the community |
| Misuse of antibiotics                             | Self-medication with antibiotics                |
|                                                   | Access to antibiotics                           |
| Patient education                                 | Counselling                                     |
|                                                   | Awareness                                       |
| Nonprescription antibiotics                       | Antibiotics without prescription                |
| Antibiotic resistance                             | Rising issue in Pakistan (Suggestions)          |
| Suggestions for the prescription only antibiotics | Physicians/medical practitioner role            |
|                                                   | Community Pharmacists role                      |
|                                                   | Government and legislation role                 |
